# Supplementary material for: Myelin oligodendrocyte glycoprotein-associated disorders are associated with HLA subtypes in a Chinese paediatric-onset cohort
Source: PubMed Central journal article supplement — J Neurol Neurosurg Psychiatry. 2020 May 19;91(7):733–9. doi: 10.1136/jnnp-2019-322115 (PMC7361006; doi:10.1136/jnnp-2019-322115), 2020-05-19
Supplement: jnnp-2019-322115supp001.pdf [file jnnp-2019-322115supp001.pdf]

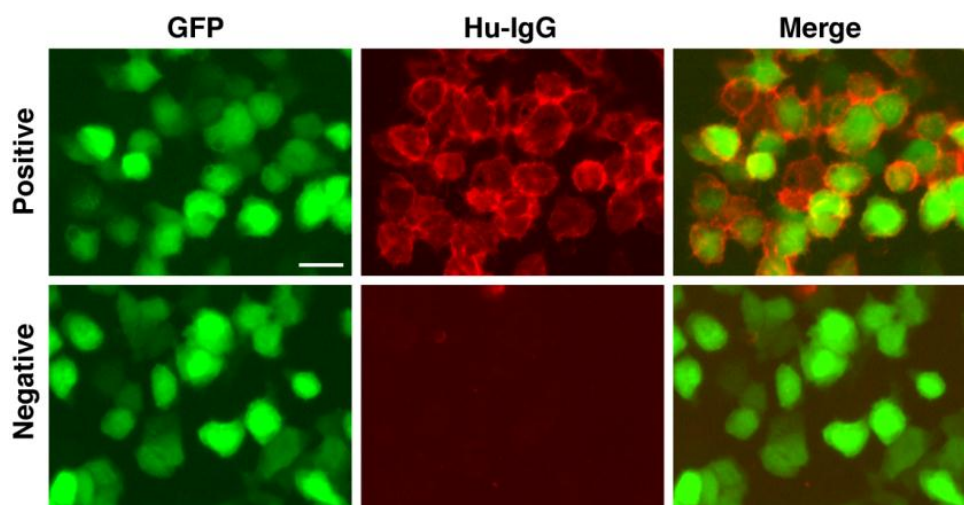

**Supplementary Figure 1: MOG-IgG in serum tested by an in-house cell-based assay using live cells transfected with full-length human MOG.** HEK293T cells were transiently transfected with full-length human MOG (Hu-MOG) and patient serum tested by an in-house cell-based assay. Binding of IgG from patient serum using an anti-human IgG antibody (red) to cells transfected with MOG (green), merged images (yellow). The patient's serum IgG could bind to Hu-MOG, while serum IgG from control group did not bind (Scale bar:20  $\mu$ m).

MOG, myelin oligodendrocyte glycoprotein; MOG-IgG, myelin oligodendrocyte glycoprotein-immunoglobulin G.

**Supplementary Table 1. HLA alleles in patients with MOGAD and in healthy controls**

| #HLA_allele | Patients |          |         | Control  |          |         | <i>p</i> | <i>p</i> <sup>adj</sup> | OR   | 95% CI      |
|-------------|----------|----------|---------|----------|----------|---------|----------|-------------------------|------|-------------|
|             | positive | negative | freq(%) | positive | negative | freq(%) |          |                         |      |             |
| A*02:06     | 10       | 180      | 5.26    | 25       | 937      | 2.6     | 0.062444 | 0.468327                | 2.08 | 0.88-4.58   |
| A*02:07     | 34       | 156      | 17.89   | 119      | 843      | 12.37   | 0.046527 | 0.468327                | 1.54 | 0.98-2.37   |
| A*11:02     | 10       | 180      | 5.26    | 33       | 929      | 3.43    | 0.212949 | 0.532372                | 1.56 | 0.67-3.32   |
| A*31:01     | 2        | 188      | 1.05    | 27       | 935      | 2.81    | 0.207609 | 0.532372                | 0.37 | 0.04-1.49   |
| A*33:03     | 12       | 178      | 6.32    | 97       | 865      | 10.08   | 0.134467 | 0.532372                | 0.6  | 0.29-1.13   |
| A*24:07     | 2        | 188      | 1.05    | 3        | 959      | 0.31    | 0.192618 | 0.532372                | 3.4  | 0.28-29.85  |
| A*01:03     | 1        | 189      | 0.53    | 1        | 961      | 0.1     | 0.302779 | 0.648811                | 5.07 | 0.06-398.19 |
| A*26:01     | 3        | 187      | 1.58    | 24       | 938      | 2.49    | 0.603159 | 0.972348                | 0.63 | 0.12-2.1    |
| A*29:01     | 2        | 188      | 1.05    | 7        | 955      | 0.73    | 0.648232 | 0.972348                | 1.45 | 0.15-7.7    |
| A*30:01     | 3        | 187      | 1.58    | 25       | 937      | 2.6     | 0.605355 | 0.972348                | 0.6  | 0.12-2      |
| A*02:01     | 13       | 177      | 6.84    | 71       | 891      | 7.38    | 0.879523 | 0.997508                | 0.92 | 0.46-1.72   |
| A*02:03     | 10       | 180      | 5.26    | 48       | 914      | 4.99    | 0.856245 | 0.997508                | 1.06 | 0.47-2.17   |
| A*11:01     | 56       | 134      | 29.47   | 289      | 673      | 30.04   | 0.931008 | 0.997508                | 0.97 | 0.68-1.38   |
| A*24:02     | 31       | 159      | 16.32   | 151      | 811      | 15.7    | 0.827978 | 0.997508                | 1.05 | 0.66-1.62   |
| A*32:01     | 1        | 189      | 0.53    | 5        | 957      | 0.52    | 1        | 1                       | 1.01 | 0.02-9.12   |
| B*48:03     | 3        | 187      | 1.58    | 0        | 962      | 0       | 0.004427 | 0.137249                | Inf  | 2.11-Inf    |
| B*13:02     | 1        | 189      | 0.53    | 26       | 936      | 2.7     | 0.109013 | 0.780852                | 0.19 | 0-1.18      |
| B*15:01     | 11       | 179      | 5.79    | 39       | 923      | 4.05    | 0.327454 | 0.780852                | 1.45 | 0.66-2.96   |
| B*15:10     | 1        | 189      | 0.53    | 0        | 962      | 0       | 0.164931 | 0.780852                | Inf  | 0.13-Inf    |
| B*15:11     | 4        | 186      | 2.11    | 10       | 952      | 1.04    | 0.266374 | 0.780852                | 2.05 | 0.46-7.19   |
| B*15:12     | 2        | 188      | 1.05    | 3        | 959      | 0.31    | 0.192618 | 0.780852                | 3.4  | 0.28-29.85  |
| B*15:18     | 2        | 188      | 1.05    | 5        | 957      | 0.52    | 0.325307 | 0.780852                | 2.03 | 0.19-12.54  |
| B*27:04     | 7        | 183      | 3.68    | 22       | 940      | 2.29    | 0.306022 | 0.780852                | 1.63 | 0.58-4.03   |
| B*35:05     | 2        | 188      | 1.05    | 5        | 957      | 0.52    | 0.325307 | 0.780852                | 2.03 | 0.19-12.54  |
| B*40:02     | 4        | 186      | 2.11    | 11       | 951      | 1.14    | 0.290372 | 0.780852                | 1.86 | 0.43-6.36   |
| B*46:01     | 35       | 155      | 18.42   | 136      | 826      | 14.14   | 0.146064 | 0.780852                | 1.37 | 0.88-2.09   |
| B*55:02     | 9        | 181      | 4.74    | 28       | 934      | 2.91    | 0.182075 | 0.780852                | 1.66 | 0.68-3.69   |
| B*73:01     | 1        | 189      | 0.53    | 0        | 962      | 0       | 0.164931 | 0.780852                | Inf  | 0.13-Inf    |
| B*07:05     | 3        | 187      | 1.58    | 8        | 954      | 0.83    | 0.403599 | 0.838144                | 1.91 | 0.32-8.06   |
| B*35:01     | 2        | 188      | 1.05    | 21       | 941      | 2.18    | 0.405553 | 0.838144                | 0.48 | 0.05-1.98   |
| B*38:01     | 1        | 189      | 0.53    | 3        | 959      | 0.31    | 0.514217 | 0.937689                | 1.69 | 0.03-21.18  |
| B*57:01     | 1        | 189      | 0.53    | 3        | 959      | 0.31    | 0.514217 | 0.937689                | 1.69 | 0.03-21.18  |
| B*07:02     | 1        | 189      | 0.53    | 12       | 950      | 1.25    | 0.706272 | 1                       | 0.42 | 0.01-2.86   |
| B*08:01     | 1        | 189      | 0.53    | 5        | 957      | 0.52    | 1        | 1                       | 1.01 | 0.02-9.12   |
| B*13:01     | 14       | 176      | 7.37    | 75       | 887      | 7.8     | 1        | 1                       | 0.94 | 0.48-1.73   |
| B*15:02     | 11       | 179      | 5.79    | 53       | 909      | 5.51    | 0.862665 | 1                       | 1.05 | 0.49-2.09   |
| B*15:25     | 2        | 188      | 1.05    | 7        | 955      | 0.73    | 0.648232 | 1                       | 1.45 | 0.15-7.7    |
| B*38:02     | 4        | 186      | 2.11    | 30       | 932      | 3.12    | 0.638606 | 1                       | 0.67 | 0.17-1.93   |
| B*39:01     | 2        | 188      | 1.05    | 15       | 947      | 1.56    | 1        | 1                       | 0.67 | 0.07-2.93   |
| B*40:01     | 29       | 161      | 15.26   | 152      | 810      | 15.8    | 0.91341  | 1                       | 0.96 | 0.6-1.49    |
| B*44:03     | 1        | 189      | 0.53    | 9        | 953      | 0.94    | 1        | 1                       | 0.56 | 0.01-4.09   |
| B*48:01     | 2        | 188      | 1.05    | 12       | 950      | 1.25    | 1        | 1                       | 0.84 | 0.09-3.83   |
| B*51:01     | 8        | 182      | 4.21    | 46       | 916      | 4.78    | 0.852272 | 1                       | 0.88 | 0.35-1.91   |
| B*54:01     | 7        | 183      | 3.68    | 28       | 934      | 2.91    | 0.642017 | 1                       | 1.28 | 0.46-3.05   |
| B*51:02     | 2        | 188      | 1.05    | 16       | 946      | 1.66    | 0.752898 | 1                       | 0.63 | 0.07-2.71   |
| B*58:01     | 17       | 173      | 8.95    | 92       | 870      | 9.56    | 0.892361 | 1                       | 0.93 | 0.51-1.62   |
| C*01:02     | 47       | 143      | 24.74   | 178      | 784      | 18.5    | 0.056692 | 0.314428                | 1.45 | 0.98-2.11   |
| C*07:02     | 22       | 168      | 11.58   | 171      | 791      | 17.78   | 0.04285  | 0.314428                | 0.61 | 0.36-0.98   |

|             |     |     |       |     |     |       |          |          |      |             |
|-------------|-----|-----|-------|-----|-----|-------|----------|----------|------|-------------|
| C*12:02     | 10  | 180 | 5.26  | 26  | 936 | 2.7   | 0.069873 | 0.314428 | 2    | 0.84-4.37   |
| C*06:02     | 2   | 188 | 1.05  | 38  | 924 | 3.95  | 0.049289 | 0.314428 | 0.26 | 0.03-1.02   |
| C*15:05     | 4   | 186 | 2.11  | 7   | 955 | 0.73  | 0.091644 | 0.329917 | 2.93 | 0.62-11.66  |
| C*03:36     | 1   | 189 | 0.53  | 0   | 962 | 0     | 0.164931 | 0.494792 | Inf  | 0.13-Inf    |
| C*01:06     | 1   | 189 | 0.53  | 1   | 961 | 0.1   | 0.302779 | 0.778574 | 5.07 | 0.06-398.19 |
| C*15:02     | 9   | 181 | 4.74  | 34  | 928 | 3.53  | 0.404601 | 0.910352 | 1.36 | 0.56-2.95   |
| C*03:03     | 12  | 178 | 6.32  | 51  | 911 | 5.3   | 0.599765 | 0.981434 | 1.2  | 0.57-2.35   |
| C*08:03     | 1   | 189 | 0.53  | 3   | 959 | 0.31  | 0.514217 | 0.981434 | 1.69 | 0.03-21.18  |
| C*14:03     | 1   | 189 | 0.53  | 4   | 958 | 0.42  | 0.594616 | 0.981434 | 1.27 | 0.03-12.9   |
| C*03:02     | 17  | 173 | 8.95  | 93  | 869 | 9.67  | 0.892525 | 1        | 0.92 | 0.5-1.6     |
| C*03:04     | 26  | 164 | 13.68 | 126 | 836 | 13.1  | 0.814974 | 1        | 1.05 | 0.64-1.68   |
| C*04:01     | 9   | 181 | 4.74  | 50  | 912 | 5.2   | 1        | 1        | 0.91 | 0.39-1.91   |
| C*04:03     | 3   | 187 | 1.58  | 13  | 949 | 1.35  | 0.737109 | 1        | 1.17 | 0.21-4.32   |
| C*08:01     | 16  | 174 | 8.42  | 84  | 878 | 8.73  | 1        | 1        | 0.96 | 0.51-1.7    |
| C*14:02     | 6   | 184 | 3.16  | 37  | 925 | 3.85  | 0.834249 | 1        | 0.82 | 0.28-1.99   |
| C*12:03     | 3   | 187 | 1.58  | 23  | 939 | 2.39  | 0.788013 | 1        | 0.66 | 0.12-2.2    |
| DQA1*01:02  | 51  | 139 | 26.84 | 192 | 770 | 19.96 | 0.040663 | 0.221472 | 1.47 | 1.01-2.13   |
| DQA1*01:03  | 7   | 183 | 3.68  | 79  | 883 | 8.21  | 0.033232 | 0.221472 | 0.43 | 0.16-0.94   |
| DQA1*01:04  | 21  | 169 | 11.05 | 66  | 896 | 6.86  | 0.051109 | 0.221472 | 1.69 | 0.95-2.88   |
| DQA1*02:01  | 3   | 187 | 1.58  | 42  | 920 | 4.37  | 0.097633 | 0.317309 | 0.35 | 0.07-1.12   |
| DQA1*01:01  | 10  | 180 | 5.26  | 35  | 927 | 3.64  | 0.304423 | 0.659583 | 1.47 | 0.64-3.1    |
| DQA1*01:05  | 4   | 186 | 2.11  | 11  | 951 | 1.14  | 0.290372 | 0.659583 | 1.86 | 0.43-6.36   |
| DQA1*05:03  | 2   | 188 | 1.05  | 23  | 939 | 2.39  | 0.410461 | 0.762285 | 0.43 | 0.05-1.78   |
| DQA1*03:01  | 11  | 179 | 5.79  | 65  | 897 | 6.76  | 0.749442 | 0.889023 | 0.85 | 0.4-1.66    |
| DQA1*03:02  | 28  | 162 | 14.74 | 136 | 826 | 14.14 | 0.820637 | 0.889023 | 1.05 | 0.65-1.65   |
| DQA1*05:05  | 12  | 178 | 6.32  | 72  | 890 | 7.48  | 0.648994 | 0.889023 | 0.83 | 0.4-1.59    |
| DQA1*05:01  | 11  | 179 | 5.79  | 64  | 898 | 6.65  | 0.749313 | 0.889023 | 0.86 | 0.4-1.69    |
| DQA1*06:01  | 14  | 176 | 7.37  | 80  | 882 | 8.32  | 0.772211 | 0.889023 | 0.88 | 0.45-1.6    |
| DQA1*03:03  | 16  | 174 | 8.42  | 80  | 882 | 8.32  | 1        | 1        | 1.01 | 0.54-1.8    |
| DQB1*05:02  | 36  | 154 | 18.95 | 103 | 859 | 10.71 | 0.002254 | 0.031556 | 1.95 | 1.25-3      |
| DQB1*05:03  | 15  | 175 | 7.89  | 40  | 922 | 4.16  | 0.03853  | 0.269712 | 1.97 | 0.99-3.75   |
| DQB1*02:02  | 3   | 187 | 1.58  | 40  | 922 | 4.16  | 0.09536  | 0.358375 | 0.37 | 0.07-1.18   |
| DQB1*03:01  | 28  | 162 | 14.74 | 190 | 772 | 19.75 | 0.127991 | 0.358375 | 0.7  | 0.44-1.09   |
| DQB1*04:01  | 15  | 175 | 7.89  | 48  | 914 | 4.99  | 0.115982 | 0.358375 | 1.63 | 0.83-3.04   |
| DQB1*02:01  | 11  | 179 | 5.79  | 65  | 897 | 6.76  | 0.749442 | 0.874349 | 0.85 | 0.4-1.66    |
| DQB1*03:02  | 11  | 179 | 5.79  | 65  | 897 | 6.76  | 0.749442 | 0.874349 | 0.85 | 0.4-1.66    |
| DQB1*03:03  | 29  | 161 | 15.26 | 158 | 804 | 16.42 | 0.747472 | 0.874349 | 0.92 | 0.57-1.43   |
| DQB1*06:01  | 18  | 172 | 9.47  | 112 | 850 | 11.64 | 0.452115 | 0.874349 | 0.79 | 0.44-1.36   |
| DQB1*06:02  | 11  | 179 | 5.79  | 50  | 912 | 5.2   | 0.723494 | 0.874349 | 1.12 | 0.52-2.23   |
| DQB1*06:03  | 3   | 187 | 1.58  | 9   | 953 | 0.94  | 0.429812 | 0.874349 | 1.7  | 0.29-6.89   |
| DQB1*06:09  | 2   | 188 | 1.05  | 18  | 944 | 1.87  | 0.55707  | 0.874349 | 0.56 | 0.06-2.36   |
| DQB1*05:01  | 7   | 183 | 3.68  | 37  | 925 | 3.85  | 1        | 1        | 0.96 | 0.35-2.22   |
| DQB1*06:04  | 1   | 189 | 0.53  | 7   | 955 | 0.73  | 1        | 1        | 0.72 | 0.02-5.67   |
| DPA1*02:02  | 124 | 66  | 65.26 | 550 | 412 | 57.17 | 0.04384  | 0.175361 | 1.41 | 1.01-1.98   |
| DPA1*02:07  | 1   | 189 | 0.53  | 0   | 962 | 0     | 0.164931 | 0.329861 | Inf  | 0.13-Inf    |
| DPA1*01:03  | 46  | 144 | 24.21 | 268 | 694 | 27.86 | 0.32743  | 0.436573 | 0.83 | 0.56-1.2    |
| DPA1*02:01  | 19  | 171 | 10    | 99  | 863 | 10.29 | 1        | 1        | 0.97 | 0.54-1.65   |
| DPB1*107:01 | 6   | 184 | 3.16  | 0   | 962 | 0     | 1.88E-05 | 0.000169 | Inf  | 6.08-Inf    |
| DPB1*104:01 | 3   | 187 | 1.58  | 0   | 962 | 0     | 0.004427 | 0.026564 | Inf  | 2.11-Inf    |
| DPB1*13:01  | 7   | 183 | 3.68  | 82  | 880 | 8.52  | 0.02456  | 0.110521 | 0.41 | 0.16-0.91   |
| DPB1*04:02  | 1   | 189 | 0.53  | 24  | 938 | 2.49  | 0.104133 | 0.374879 | 0.21 | 0.01-1.29   |

|             |    |     |       |     |     |       |          |          |     |                  |
|-------------|----|-----|-------|-----|-----|-------|----------|----------|-----|------------------|
| DPB1*22:XX  | 1  | 189 | 0.53  | 0   | 962 | 0     | 0.164931 | 0.494792 | Inf | 0.13-Inf         |
| DPB1*01:01  | 1  | 189 | 0.53  | 1   | 961 | 0.1   | 0.302779 | 0.729996 |     | 5.07 0.06-398.19 |
| DPB1*04:01  | 11 | 179 | 5.79  | 77  | 885 | 8     | 0.369542 | 0.729996 |     | 0.71 0.33-1.37   |
| DPB1*17:01  | 2  | 188 | 1.05  | 21  | 941 | 2.18  | 0.405553 | 0.729996 |     | 0.48 0.05-1.98   |
| DPB1*19:01  | 2  | 188 | 1.05  | 5   | 957 | 0.52  | 0.325307 | 0.729996 |     | 2.03 0.19-12.54  |
| DPB1*02:01  | 23 | 167 | 12.11 | 130 | 832 | 13.51 | 0.641905 | 0.782138 |     | 0.88 0.52-1.43   |
| DPB1*02:02  | 16 | 174 | 8.42  | 71  | 891 | 7.38  | 0.651781 | 0.782138 |     | 1.15 0.61-2.06   |
| DPB1*03:01  | 7  | 183 | 3.68  | 47  | 915 | 4.89  | 0.575571 | 0.782138 |     | 0.74 0.28-1.69   |
| DPB1*05:01  | 89 | 101 | 46.84 | 425 | 537 | 44.18 | 0.523322 | 0.782138 |     | 1.11 0.8-1.54    |
| DPB1*31:01  | 1  | 189 | 0.53  | 3   | 959 | 0.31  | 0.514217 | 0.782138 |     | 1.69 0.03-21.18  |
| DPB1*09:01  | 2  | 188 | 1.05  | 9   | 953 | 0.94  | 0.700543 | 0.78811  |     | 1.13 0.12-5.5    |
| DPB1*21:01  | 3  | 187 | 1.58  | 21  | 941 | 2.18  | 0.783912 | 0.830025 |     | 0.72 0.14-2.44   |
| DPB1*14:01  | 7  | 183 | 3.68  | 35  | 927 | 3.64  | 1        | 1        |     | 1.01 0.37-2.36   |
| DPB1*135:01 | 8  | 182 | 4.21  | 0   | 962 | 0     | 4.83E-07 | 8.70E-06 | Inf | 8.9-Inf          |
| DRB1*08:03  | 4  | 186 | 2.11  | 69  | 893 | 7.17  | 0.005451 | 0.127752 |     | 0.28 0.07-0.76   |
| DRB1*16:02  | 17 | 173 | 8.95  | 41  | 921 | 4.26  | 0.010646 | 0.127752 |     | 2.21 1.15-4.08   |
| DRB1*14:05  | 8  | 182 | 4.21  | 16  | 946 | 1.66  | 0.04459  | 0.267541 |     | 2.6 0.95-6.54    |
| DRB1*15:02  | 11 | 179 | 5.79  | 26  | 936 | 2.7   | 0.039734 | 0.267541 |     | 2.21 0.97-4.73   |
| DRB1*04:05  | 18 | 172 | 9.47  | 56  | 906 | 5.82  | 0.073523 | 0.294093 |     | 1.69 0.91-3.01   |
| DRB1*07:01  | 3  | 187 | 1.58  | 43  | 919 | 4.47  | 0.067821 | 0.294093 |     | 0.34 0.07-1.09   |
| DRB1*15:01  | 28 | 162 | 14.74 | 108 | 854 | 11.23 | 0.17641  | 0.604834 |     | 1.37 0.84-2.17   |
| DRB1*04:03  | 2  | 188 | 1.05  | 24  | 938 | 2.49  | 0.291595 | 0.644884 |     | 0.42 0.05-1.7    |
| DRB1*04:04  | 2  | 188 | 1.05  | 4   | 958 | 0.42  | 0.258858 | 0.644884 |     | 2.54 0.23-17.9   |
| DRB1*10:01  | 4  | 186 | 2.11  | 10  | 952 | 1.04  | 0.266374 | 0.644884 |     | 2.05 0.46-7.19   |
| DRB1*11:01  | 7  | 183 | 3.68  | 55  | 907 | 5.72  | 0.295572 | 0.644884 |     | 0.63 0.24-1.42   |
| DRB1*13:01  | 3  | 187 | 1.58  | 8   | 954 | 0.83  | 0.403599 | 0.668755 |     | 1.91 0.32-8.06   |
| DRB1*14:07  | 1  | 189 | 0.53  | 2   | 960 | 0.21  | 0.417972 | 0.668755 |     | 2.54 0.04-48.95  |
| DRB1*14:54  | 11 | 179 | 5.79  | 41  | 921 | 4.26  | 0.341199 | 0.668755 |     | 1.38 0.63-2.8    |
| DRB1*14:18  | 1  | 189 | 0.53  | 2   | 960 | 0.21  | 0.417972 | 0.668755 |     | 2.54 0.04-48.95  |
| DRB1*03:01  | 11 | 179 | 5.79  | 67  | 895 | 6.96  | 0.63763  | 0.900183 |     | 0.82 0.38-1.6    |
| DRB1*13:02  | 3  | 187 | 1.58  | 24  | 938 | 2.49  | 0.603159 | 0.900183 |     | 0.63 0.12-2.1    |
| DRB1*12:02  | 15 | 175 | 7.89  | 88  | 874 | 9.15  | 0.676932 | 0.902576 |     | 0.85 0.45-1.53   |
| DRB1*09:01  | 28 | 162 | 14.74 | 155 | 807 | 16.11 | 0.744524 | 0.903477 |     | 0.9 0.56-1.41    |
| DRB1*13:12  | 2  | 188 | 1.05  | 16  | 946 | 1.66  | 0.752898 | 0.903477 |     | 0.63 0.07-2.71   |
| DRB1*12:01  | 4  | 186 | 2.11  | 28  | 934 | 2.91  | 0.808237 | 0.923699 |     | 0.72 0.18-2.09   |
| DRB1*01:01  | 1  | 189 | 0.53  | 10  | 952 | 1.04  | 1        | 1        |     | 0.5 0.01-3.58    |
| DRB1*04:06  | 5  | 185 | 2.63  | 26  | 936 | 2.7   | 1        | 1        |     | 0.97 0.29-2.62   |
| DRB1*08:02  | 1  | 189 | 0.53  | 7   | 955 | 0.73  | 1        | 1        |     | 0.72 0.02-5.67   |

**Supplementary Table 2. Association of the *DQB1\*05:02-DRB1\*16:02* alleles or haplotype with MOGAD**

| Alleles or Haplotype            | Patients  |            |               | Controls (n = 481) |            |               | <i>p</i>      | <i>p</i> <sup>adj</sup> | OR [95% CI]             |
|---------------------------------|-----------|------------|---------------|--------------------|------------|---------------|---------------|-------------------------|-------------------------|
|                                 | positive  | negative   | freq          | positive           | negative   | freq          |               |                         |                         |
| <b>All patients (n = 95 )</b>   |           |            |               |                    |            |               |               |                         |                         |
| <i>DQB1*05:02</i>               | <b>36</b> | <b>154</b> | <b>0.1895</b> | <b>103</b>         | <b>859</b> | <b>0.1071</b> | <b>0.0023</b> | <b>0.0316</b>           | <b>1.95[1.25-3.00]</b>  |
| <i>DRB1*16:02</i>               | 17        | 173        | 0.0895        | 41                 | 921        | 0.0426        | 0.0106        | 0.1278                  | 2.21 [1.15-4.08]        |
| <i>DQB1*05:02- DRB1*16:02</i>   | 14        | 81         | 0.1474        | 38                 | 443        | 0.0790        | 0.0478        | 0.0956                  | 2.01[0.96-4.01]         |
| <b>Pediatric-onset (n = 51)</b> |           |            |               |                    |            |               |               |                         |                         |
| <i>DQB1*05:02</i>               | <b>23</b> | <b>79</b>  | <b>0.2255</b> | <b>103</b>         | <b>859</b> | <b>0.1071</b> | <b>0.0011</b> | <b>0.0154</b>           | <b>2.43[1.39-4.11]</b>  |
| <i>DRB1*16:02</i>               | <b>13</b> | <b>89</b>  | <b>0.1275</b> | <b>41</b>          | <b>921</b> | <b>0.0426</b> | <b>0.0011</b> | <b>0.0221</b>           | <b>3.28 [1.55-6.52]</b> |
| <i>DRB1*16:02-DQB1*05:02</i>    | <b>10</b> | <b>41</b>  | <b>0.1961</b> | <b>38</b>          | <b>443</b> | <b>0.0790</b> | <b>0.0166</b> | <b>0.0331</b>           | <b>2.84[1.17-6.35]</b>  |
| <b>Adult-onset (n = 44)</b>     |           |            |               |                    |            |               |               |                         |                         |
| <i>DQB1*05:02</i>               | 13        | 75         | 0.1477        | 103                | 859        | 0.1071        | 0.2839        | 0.8516                  | 1.44[0.71-2.74]         |
| <i>DRB1*16:02</i>               | 4         | 84         | 0.0455        | 41                 | 921        | 0.0426        | 0.7856        | 0.9966                  | 1.07 [0.27-3.06]        |
| <i>DRB1*16:02-DQB1*05:02</i>    | 4         | 40         | 0.0909        | 38                 | 443        | 0.0790        | 0.7703        | 1                       | 1.17[0.29-3.49]         |

MOGAD, Myelin oligodendrocyte glycoprotein associated disorders; freq, frequency; CI, confidence interval; OR, odds ratio  
*p*-values adjusted for multiple testing via the false discovery rate (FDR) step-up method

**Supplementary Table 3. HLA alleles in adult-onset patients with MOGAD and in healthy controls**

| #HLA_allele | Patients |          |         | Control  |          |         | <i>p</i> | <i>p</i> <sup>adj</sup> | OR    | 95% CI      |
|-------------|----------|----------|---------|----------|----------|---------|----------|-------------------------|-------|-------------|
|             | positive | negative | freq(%) | positive | negative | freq(%) |          |                         |       |             |
| A*02:06     | 7        | 81       | 7.95    | 25       | 937      | 2.6     | 0.013582 | 0.162983                | 3.23  | 1.15-8      |
| A*02:07     | 18       | 70       | 20.45   | 119      | 843      | 12.37   | 0.045244 | 0.271462                | 1.82  | 0.98-3.22   |
| A*01:03     | 1        | 87       | 1.14    | 1        | 961      | 0.1     | 0.160668 | 0.642673                | 10.99 | 0.14-861.25 |
| A*02:03     | 7        | 81       | 7.95    | 48       | 914      | 4.99    | 0.214451 | 0.643353                | 1.64  | 0.61-3.82   |
| A*02:01     | 5        | 83       | 5.68    | 71       | 891      | 7.38    | 0.671636 | 0.869158                | 0.76  | 0.23-1.92   |
| A*11:01     | 24       | 64       | 27.27   | 289      | 673      | 30.04   | 0.62815  | 0.869158                | 0.87  | 0.51-1.45   |
| A*26:01     | 1        | 87       | 1.14    | 24       | 938      | 2.49    | 0.715318 | 0.869158                | 0.45  | 0.01-2.83   |
| A*31:01     | 1        | 87       | 1.14    | 27       | 935      | 2.81    | 0.724298 | 0.869158                | 0.4   | 0.01-2.48   |
| A*33:03     | 7        | 81       | 7.95    | 97       | 865      | 10.08   | 0.708402 | 0.869158                | 0.77  | 0.29-1.73   |
| A*29:01     | 1        | 87       | 1.14    | 7        | 955      | 0.73    | 0.504753 | 0.869158                | 1.57  | 0.03-12.43  |
| A*24:02     | 13       | 75       | 14.77   | 151      | 811      | 15.7    |          | 1                       | 0.93  | 0.46-1.74   |
| A*11:02     | 3        | 85       | 3.41    | 33       | 929      | 3.43    |          | 1                       | 0.99  | 0.19-3.27   |
| B*46:01     | 19       | 69       | 21.59   | 136      | 826      | 14.14   | 0.082154 | 0.502857                | 1.67  | 0.92-2.92   |
| B*54:01     | 7        | 81       | 7.95    | 28       | 934      | 2.91    | 0.022043 | 0.502857                | 2.88  | 1.03-7.02   |
| B*48:03     | 1        | 87       | 1.14    | 0        | 962      | 0       | 0.08381  | 0.502857                | Inf   | 0.28-Inf    |
| B*73:01     | 1        | 87       | 1.14    | 0        | 962      | 0       | 0.08381  | 0.502857                | Inf   | 0.28-Inf    |
| B*07:05     | 1        | 87       | 1.14    | 8        | 954      | 0.83    | 0.546578 | 0.874526                | 1.37  | 0.03-10.42  |
| B*08:01     | 1        | 87       | 1.14    | 5        | 957      | 0.52    | 0.40933  | 0.874526                | 2.2   | 0.05-19.96  |
| B*15:01     | 5        | 83       | 5.68    | 39       | 923      | 4.05    | 0.407588 | 0.874526                | 1.43  | 0.43-3.76   |
| B*15:25     | 1        | 87       | 1.14    | 7        | 955      | 0.73    | 0.504753 | 0.874526                | 1.57  | 0.03-12.43  |
| B*27:04     | 3        | 85       | 3.41    | 22       | 940      | 2.29    | 0.459268 | 0.874526                | 1.51  | 0.28-5.17   |
| B*40:01     | 11       | 77       | 12.5    | 152      | 810      | 15.8    | 0.537841 | 0.874526                | 0.76  | 0.36-1.48   |
| B*40:02     | 2        | 86       | 2.27    | 11       | 951      | 1.14    | 0.298396 | 0.874526                | 2.01  | 0.21-9.43   |
| B*48:01     | 2        | 86       | 2.27    | 12       | 950      | 1.25    | 0.330553 | 0.874526                | 1.84  | 0.2-8.47    |
| B*55:02     | 5        | 83       | 5.68    | 28       | 934      | 2.91    | 0.188345 | 0.874526                | 2.01  | 0.59-5.46   |
| B*38:02     | 1        | 87       | 1.14    | 30       | 932      | 3.12    | 0.507691 | 0.874526                | 0.36  | 0.01-2.21   |
| B*15:12     | 1        | 87       | 1.14    | 3        | 959      | 0.31    | 0.295768 | 0.874526                | 3.67  | 0.07-46.2   |
| B*44:03     | 1        | 87       | 1.14    | 9        | 953      | 0.94    | 0.584908 | 0.877362                | 1.22  | 0.03-8.96   |
| B*07:02     | 1        | 87       | 1.14    | 12       | 950      | 1.25    |          | 1                       | 0.91  | 0.02-6.29   |
| B*13:01     | 6        | 82       | 6.82    | 75       | 887      | 7.8     |          | 1                       | 0.87  | 0.3-2.06    |
| B*15:02     | 4        | 84       | 4.55    | 53       | 909      | 5.51    |          | 1                       | 0.82  | 0.21-2.3    |
| B*35:01     | 2        | 86       | 2.27    | 21       | 941      | 2.18    |          | 1                       | 1.04  | 0.12-4.38   |
| B*51:01     | 3        | 85       | 3.41    | 46       | 916      | 4.78    | 0.7917   |                         | 0.7   | 0.14-2.26   |
| B*39:01     | 1        | 87       | 1.14    | 15       | 947      | 1.56    |          | 1                       | 0.73  | 0.02-4.83   |
| B*51:02     | 1        | 87       | 1.14    | 16       | 946      | 1.66    |          | 1                       | 0.68  | 0.02-4.48   |
| B*58:01     | 8        | 80       | 9.09    | 92       | 870      | 9.56    |          | 1                       | 0.95  | 0.38-2.04   |
| C*01:02     | 25       | 63       | 28.41   | 178      | 784      | 18.5    | 0.033377 | 0.434839                | 1.75  | 1.02-2.91   |
| C*01:06     | 1        | 87       | 1.14    | 1        | 961      | 0.1     | 0.160668 | 0.434839                | 10.99 | 0.14-861.25 |
| C*07:02     | 10       | 78       | 11.36   | 171      | 791      | 17.78   | 0.141646 | 0.434839                | 0.59  | 0.27-1.18   |
| C*12:02     | 5        | 83       | 5.68    | 26       | 936      | 2.7     | 0.173936 | 0.434839                | 2.17  | 0.63-5.94   |
| C*15:02     | 6        | 82       | 6.82    | 34       | 928      | 3.53    | 0.138442 | 0.434839                | 2     | 0.67-5      |
| C*15:05     | 2        | 86       | 2.27    | 7        | 955      | 0.73    | 0.170153 | 0.434839                | 3.17  | 0.32-16.98  |
| C*08:03     | 1        | 87       | 1.14    | 3        | 959      | 0.31    | 0.295768 | 0.633789                | 3.67  | 0.07-46.2   |
| C*14:03     | 1        | 87       | 1.14    | 4        | 958      | 0.42    | 0.355015 | 0.665654                | 2.75  | 0.06-28.18  |
| C*08:01     | 5        | 83       | 5.68    | 84       | 878      | 8.73    | 0.424689 | 0.707815                | 0.63  | 0.19-1.59   |
| C*03:02     | 9        | 79       | 10.23   | 93       | 869      | 9.67    | 0.850743 |                         | 1.06  | 0.45-2.22   |
| C*03:03     | 4        | 84       | 4.55    | 51       | 911      | 5.3     |          | 1                       | 0.85  | 0.22-2.4    |

|             |    |    |       |     |     |       |          |          |      |             |
|-------------|----|----|-------|-----|-----|-------|----------|----------|------|-------------|
| C*03:04     | 12 | 76 | 13.64 | 126 | 836 | 13.1  | 0.86927  | 1        | 1.05 | 0.5-2.01    |
| C*04:01     | 4  | 84 | 4.55  | 50  | 912 | 5.2   | 1        | 1        | 0.87 | 0.22-2.45   |
| C*04:03     | 1  | 87 | 1.14  | 13  | 949 | 1.35  | 1        | 1        | 0.84 | 0.02-5.71   |
| C*12:03     | 2  | 86 | 2.27  | 23  | 939 | 2.39  | 1        | 1        | 0.95 | 0.11-3.95   |
| DQA1*01:01  | 6  | 82 | 6.82  | 35  | 927 | 3.64  | 0.14655  | 0.806027 | 1.94 | 0.65-4.84   |
| DQA1*01:04  | 10 | 78 | 11.36 | 66  | 896 | 6.86  | 0.130163 | 0.806027 | 1.74 | 0.77-3.58   |
| DQA1*01:02  | 19 | 69 | 21.59 | 192 | 770 | 19.96 | 0.678855 | 1        | 1.1  | 0.61-1.91   |
| DQA1*01:03  | 5  | 83 | 5.68  | 79  | 883 | 8.21  | 0.538064 | 1        | 0.67 | 0.21-1.71   |
| DQA1*03:01  | 4  | 84 | 4.55  | 65  | 897 | 6.76  | 0.65079  | 1        | 0.66 | 0.17-1.83   |
| DQA1*03:02  | 13 | 75 | 14.77 | 136 | 826 | 14.14 | 0.873205 | 1        | 1.05 | 0.52-1.98   |
| DQA1*03:03  | 10 | 78 | 11.36 | 80  | 882 | 8.32  | 0.31999  | 1        | 1.41 | 0.63-2.88   |
| DQA1*01:05  | 1  | 87 | 1.14  | 11  | 951 | 1.14  | 1        | 1        | 0.99 | 0.02-6.99   |
| DQA1*05:01  | 6  | 82 | 6.82  | 64  | 898 | 6.65  | 1        | 1        | 1.03 | 0.35-2.46   |
| DQA1*05:05  | 7  | 81 | 7.95  | 72  | 890 | 7.48  | 0.832874 | 1        | 1.07 | 0.4-2.42    |
| DQA1*06:01  | 7  | 81 | 7.95  | 80  | 882 | 8.32  | 1        | 1        | 0.95 | 0.36-2.15   |
| DQB1*05:03  | 9  | 79 | 10.23 | 40  | 922 | 4.16  | 0.0168   | 0.201597 | 2.62 | 1.08-5.75   |
| DQB1*04:01  | 9  | 79 | 10.23 | 48  | 914 | 4.99  | 0.047832 | 0.286993 | 2.17 | 0.9-4.68    |
| DQB1*05:02  | 13 | 75 | 14.77 | 103 | 859 | 10.71 | 0.283879 | 0.851636 | 1.44 | 0.71-2.74   |
| DQB1*02:02  | 1  | 87 | 1.14  | 40  | 922 | 4.16  | 0.247027 | 0.851636 | 0.27 | 0.01-1.61   |
| DQB1*03:01  | 14 | 74 | 15.91 | 190 | 772 | 19.75 | 0.481273 | 0.918922 | 0.77 | 0.39-1.41   |
| DQB1*03:02  | 4  | 84 | 4.55  | 65  | 897 | 6.76  | 0.65079  | 0.918922 | 0.66 | 0.17-1.83   |
| DQB1*03:03  | 13 | 75 | 14.77 | 158 | 804 | 16.42 | 0.76465  | 0.918922 | 0.88 | 0.44-1.65   |
| DQB1*05:01  | 2  | 86 | 2.27  | 37  | 925 | 3.85  | 0.765769 | 0.918922 | 0.58 | 0.07-2.32   |
| DQB1*06:02  | 6  | 82 | 6.82  | 50  | 912 | 5.2   | 0.460085 | 0.918922 | 1.33 | 0.45-3.24   |
| DQB1*06:03  | 1  | 87 | 1.14  | 9   | 953 | 0.94  | 0.584908 | 0.918922 | 1.22 | 0.03-8.96   |
| DQB1*02:01  | 6  | 82 | 6.82  | 65  | 897 | 6.76  | 1        | 1        | 1.01 | 0.35-2.42   |
| DQB1*06:01  | 10 | 78 | 11.36 | 112 | 850 | 11.64 | 1        | 1        | 0.97 | 0.44-1.96   |
| DPA1*02:02  | 59 | 29 | 67.05 | 550 | 412 | 57.17 | 0.090076 | 0.270228 | 1.52 | 0.94-2.51   |
| DPA1*02:01  | 6  | 82 | 6.82  | 99  | 863 | 10.29 | 0.35718  | 0.535769 | 0.64 | 0.22-1.5    |
| DPA1*01:03  | 23 | 65 | 26.14 | 268 | 694 | 27.86 | 0.804036 | 0.804036 | 0.92 | 0.53-1.53   |
| DPB1*135:01 | 4  | 84 | 4.55  | 0   | 962 | 0     | 4.63E-05 | 0.000648 | Inf  | 7.39-Inf    |
| DPB1*107:01 | 3  | 85 | 3.41  | 0   | 962 | 0     | 0.00057  | 0.003993 | Inf  | 4.58-Inf    |
| DPB1*104:01 | 1  | 87 | 1.14  | 0   | 962 | 0     | 0.08381  | 0.293333 | Inf  | 0.28-Inf    |
| DPB1*22:XX  | 1  | 87 | 1.14  | 0   | 962 | 0     | 0.08381  | 0.293333 | Inf  | 0.28-Inf    |
| DPB1*05:01  | 44 | 44 | 50    | 425 | 537 | 44.18 | 0.31433  | 0.622324 | 1.26 | 0.8-2       |
| DPB1*13:01  | 4  | 84 | 4.55  | 82  | 880 | 8.52  | 0.227553 | 0.622324 | 0.51 | 0.13-1.41   |
| DPB1*14:01  | 1  | 87 | 1.14  | 35  | 927 | 3.64  | 0.355614 | 0.622324 | 0.3  | 0.01-1.86   |
| DPB1*31:01  | 1  | 87 | 1.14  | 3   | 959 | 0.31  | 0.295768 | 0.622324 | 3.67 | 0.07-46.2   |
| DPB1*04:01  | 5  | 83 | 5.68  | 77  | 885 | 8     | 0.537701 | 0.836424 | 0.69 | 0.21-1.76   |
| DPB1*02:02  | 5  | 83 | 5.68  | 71  | 891 | 7.38  | 0.671636 | 0.910405 | 0.76 | 0.23-1.92   |
| DPB1*04:02  | 1  | 87 | 1.14  | 24  | 938 | 2.49  | 0.715318 | 0.910405 | 0.45 | 0.01-2.83   |
| DPB1*03:01  | 5  | 83 | 5.68  | 47  | 915 | 4.89  | 0.795439 | 0.928012 | 1.17 | 0.35-3.05   |
| DPB1*02:01  | 11 | 77 | 12.5  | 130 | 832 | 13.51 | 0.871606 | 0.938653 | 0.91 | 0.43-1.79   |
| DPB1*21:01  | 2  | 86 | 2.27  | 21  | 941 | 2.18  | 1        | 1        | 1.04 | 0.12-4.38   |
| DRB1*04:05  | 11 | 77 | 12.5  | 56  | 906 | 5.82  | 0.021486 | 0.182631 | 2.31 | 1.05-4.69   |
| DRB1*15:02  | 7  | 81 | 7.95  | 26  | 936 | 2.7   | 0.016084 | 0.182631 | 3.11 | 1.1-7.64    |
| DRB1*14:05  | 4  | 84 | 4.55  | 16  | 946 | 1.66  | 0.079042 | 0.447907 | 2.81 | 0.67-8.98   |
| DRB1*15:01  | 14 | 74 | 15.91 | 108 | 854 | 11.23 | 0.221245 | 0.785898 | 1.5  | 0.75-2.79   |
| DRB1*14:18  | 1  | 87 | 1.14  | 2   | 960 | 0.21  | 0.231146 | 0.785898 | 5.5  | 0.09-106.66 |
| DRB1*08:03  | 4  | 84 | 4.55  | 69  | 893 | 7.17  | 0.509628 | 0.988448 | 0.62 | 0.16-1.71   |

---

|            |    |    |       |     |     |       |          |          |      |            |           |
|------------|----|----|-------|-----|-----|-------|----------|----------|------|------------|-----------|
| DRB1*11:01 | 3  | 85 | 3.41  | 55  | 907 | 5.72  | 0.470687 | 0.988448 | 0.58 | 0.11-1.86  |           |
| DRB1*13:01 | 1  | 87 | 1.14  | 8   | 954 | 0.83  | 0.546578 | 0.988448 | 1.37 | 0.03-10.42 |           |
| DRB1*14:54 | 5  | 83 | 5.68  | 41  | 921 | 4.26  | 0.58144  | 0.988448 | 1.35 | 0.41-3.55  |           |
| DRB1*08:02 | 1  | 87 | 1.14  | 7   | 955 | 0.73  | 0.504753 | 0.988448 | 1.57 | 0.03-12.43 |           |
| DRB1*04:06 | 3  | 85 | 3.41  | 26  | 936 | 2.7   | 0.728794 | 0.996581 | 1.27 | 0.24-4.28  |           |
| DRB1*09:01 | 13 | 75 | 14.77 | 155 | 807 | 16.11 | 0.879336 | 0.996581 | 0.9  | 0.45-1.69  |           |
| DRB1*12:02 | 7  | 81 | 7.95  | 88  | 874 | 9.15  | 0.847064 | 0.996581 | 0.86 | 0.32-1.93  |           |
| DRB1*12:01 | 3  | 85 | 3.41  | 28  | 934 | 2.91  | 0.73953  | 0.996581 | 1.18 | 0.22-3.93  |           |
| DRB1*16:02 | 4  | 84 | 4.55  | 41  | 921 | 4.26  | 0.785566 | 0.996581 | 1.07 | 0.27-3.06  |           |
| DRB1*03:01 | 6  | 82 | 6.82  | 67  | 895 | 6.96  |          | 1        | 1    | 0.98       | 0.34-2.34 |
| DRB1*10:01 | 1  | 87 | 1.14  | 10  | 952 | 1.04  |          | 1        | 1    | 1.09       | 0.02-7.85 |

---
